# Supplementary material for: Exploration of the Biocontrol Activity of Bacillus atrophaeus Strain HF1 against Pear Valsa Canker Caused by Valsa pyri
Source: MDPI journal article supplement (doi:10.3390/ijms242015477), 2023-10-23
Supplement: s1 [file s1]

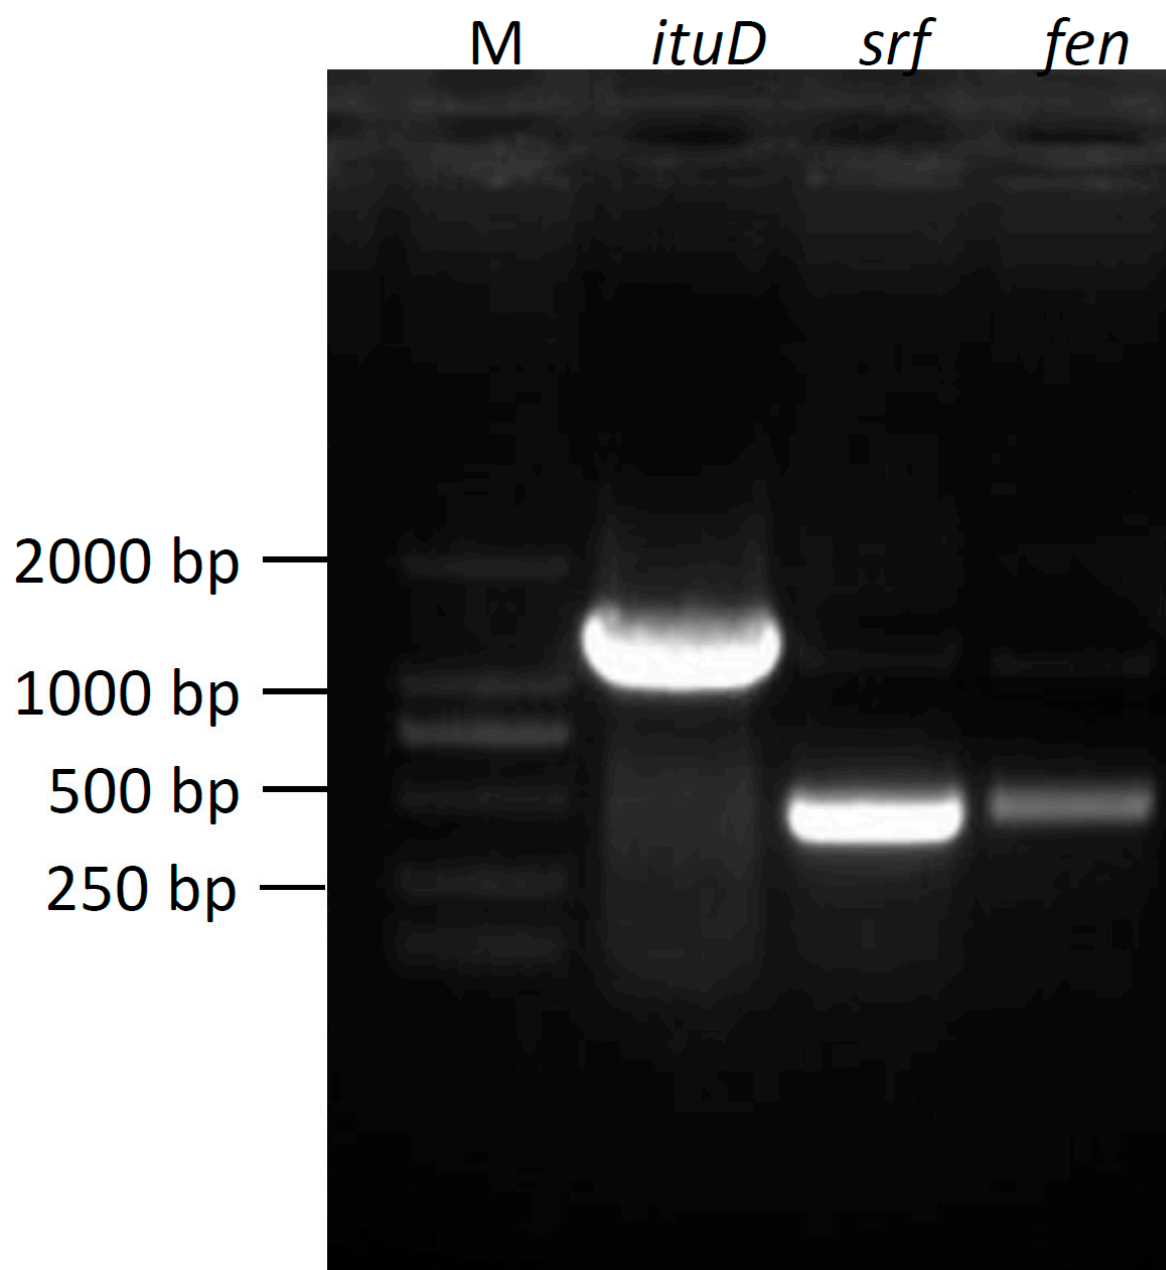

Figure S1: Amplification of antibiotic biosynthesis genes in *B. atrophaeus* strain HF1.

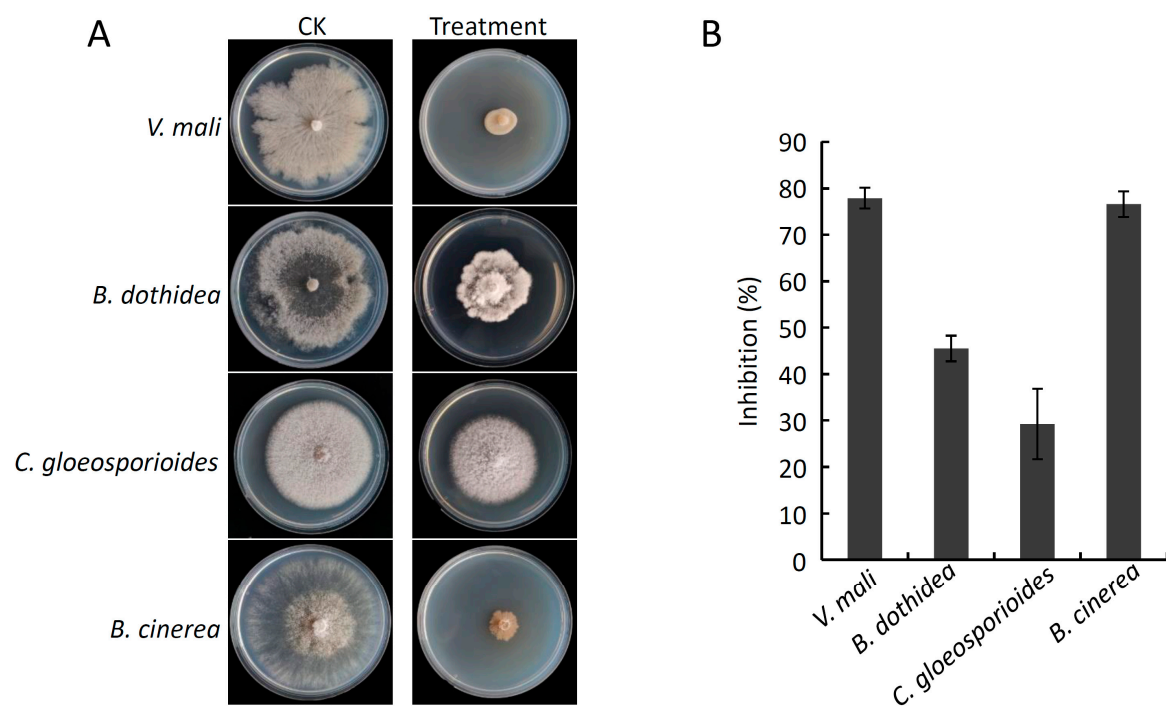

Figure S2: Effect of *B. atrophaeus* strain HF1-produced VOCs on other fruit pathogens growth. **(A)** *V. pyri* colony morphology after fumigation with 100  $\mu\text{L}$  of  $1 \times 10^8$  CFU  $\text{mL}^{-1}$  of strain HF1 cell suspension. **(B)** Inhibition rate. Each dataset is expressed as the mean  $\pm$  SD of three biological replicates. Different lowercase letters denote significant differences at  $P < 0.05$  between different treatments. The experiment was performed independently three times with similar results.
