# Supplementary material for: Exploration of the Biocontrol Activity of Bacillus atrophaeus Strain HF1 against Pear Valsa Canker Caused by Valsa pyri
Source: MDPI journal article supplement (doi:10.3390/ijms242015477), 2023-10-23
Supplement: s1 [file s1]

**Table S1. Physiological and biochemical characters of strain HF1**

| Test                      | Reaction <sup>a</sup> |
|---------------------------|-----------------------|
| Gram stain                | +                     |
| Voges-Proskauer (VP) test | +                     |
| Gelatin liquefaction      | +                     |
| Methyl red test           | –                     |
| Nitrate reductase         | +                     |
| Starch hydrolysis         | +                     |
| Protease                  | +                     |
| Chitinase                 | +                     |
| Sucrose fermentation      | +                     |
| Xylose fermentation       | –                     |
| Mannitol fermentation     | –                     |

<sup>a</sup> + and – represent positive and negative reactions, respectively. Data within each column are the means of three independent experiments.

**Table S2. Toxicity test of three pure compounds on *V. pyri***

| Pure compounds        | EC <sub>50</sub> (μL L <sup>-1</sup> ) | Regression equation | Correlation coefficient |
|-----------------------|----------------------------------------|---------------------|-------------------------|
| Hexanoic acid         | 6.65                                   | y=2.9129+2.5357x    | 0.9872                  |
| Iberverin             | 0.30                                   | y=7.2351+4.2403x    | 0.9416                  |
| 2-Methylvaleraldehyde | 74.07                                  | y=-18.4226+12.5278x | 0.9642                  |

**Table S3. Primers used in this study**

| Primer      | Primer sequence (5'-3')  | Gene        |
|-------------|--------------------------|-------------|
| SR1         | AAGGAGGTGATCCAGCCGCA     | 16S rDNA    |
| SR2         | AGAGTTTGATCCTGGCTCAG     |             |
| gyrA_F      | CAGTCAGGAAATGCGTACGTCCTT | <i>gyrA</i> |
| gyrA_R      | CAAGGTAATGCTCCAGGCATTGCT |             |
| groEL-550f  | GAGCTTGAAGTKGTTGAAGG     | <i>groE</i> |
| groEL-1497r | TGAGCGGTWACTTTTGTWG      |             |
| ituD-F      | ATGAACAATCTTGCCTTTTTA    | <i>ituD</i> |
| ituD-R      | TTATTTTAAAATCCGCAATT     |             |
| Sur-F       | CGCGGMTACCGVATYGAGC      | <i>srf</i>  |
| Sur-R       | ATBCCTTTBTWDGAATGTCCGCC  |             |
| Fen-F       | GAATAYMTCGGMCGTMTKGA     | <i>fen</i>  |
| Fen-R       | GCTTTWADKGAATSBCCGCC     |             |
